# Supplementary material for: Large-Scale Lever-Based Triboelectric Nanogenerator for Sensing Lateral Vibration and Wrist or Finger Bending for Controlling Shooting Game
Source: Micromachines (Basel). 2021 Sep 18;12(9):1126. doi: 10.3390/mi12091126 (PMC8466037; doi:10.3390/mi12091126)
Supplement: Supplementary file 1 [file micromachines-12-01126-s001.zip]

Archive with 5 entries (5 files):
- micromachines-1342274-supplementary materials.pdf
- VideoS1_LED.mp4
- VideoS2_VibrationSensor.mp4
- VideoS3_Reloading.mp4
- VideoS4_FingerBending.mp4
